# Supplementary material
Source: HighWire-hosted journal article supplement (https://oem.bmj.com/content/77/2/122)
Supplement: inline-supplementary-material-3 [file inline-supplementary-material-3.pdf]

## Appendix 3 Best evidence synthesis guidelines

| Level of evidence | Minimum quality                                                                                   | Minimum quantity                                                                                                        | Consistency                                                                                                                                                                                                    | Strength of message                         |
|-------------------|---------------------------------------------------------------------------------------------------|-------------------------------------------------------------------------------------------------------------------------|----------------------------------------------------------------------------------------------------------------------------------------------------------------------------------------------------------------|---------------------------------------------|
| Strong            | High                                                                                              | Three                                                                                                                   | Three high-quality studies agree.<br><br>If more than three studies, $\frac{3}{4}$ of the medium and high-quality studies agree.                                                                               | Recommendations                             |
| Moderate          | Medium                                                                                            | Two high-quality studies<br>OR<br>two medium-quality studies and one high-quality study                                 | Two high-quality studies agree<br>OR<br>two medium-quality studies and one high-quality study agree.<br><br>If more than three studies, more than $\frac{2}{3}$ of the medium- and high-quality studies agree. | Practice considerations                     |
| Limited           | Medium                                                                                            | One high-quality study<br>OR<br>two medium-quality studies<br>OR<br>one medium quality-study and one high-quality study | Two medium- and/or high-quality studies agree.<br><br>If more than two studies, more than $\frac{1}{2}$ of the medium- and high-quality studies agree.                                                         | Not enough evidence to make recommendations |
| Mixed             | Medium and high                                                                                   | Two studies                                                                                                             | Findings from medium- and high-quality studies are contradictory.                                                                                                                                              | Not enough evidence to make recommendations |
| Insufficient      | No high-quality studies, only one medium-quality study, and/or any number of low-quality studies. |                                                                                                                         |                                                                                                                                                                                                                |                                             |

\* definitions of high and medium quality based on Quality Appraisal procedure. Best evidence synthesis guidelines copied from Breslin FC, Dollack J, Mahood Q, et al. Are new workers at elevated risk for work injury? A systematic review. *Occup Environ Med* 2019;oemed-2018-105639. doi: 10.1136/oemed-2018-105639
